# Supplementary material for: Technological and Sensory Quality of Gluten-Free Pasta Made from Flint Maize Cultivars
Source: MDPI journal article supplement (doi:10.3390/foods12142780), 2023-07-21
Supplement: s1 [file s1]

**Table S1.** Relative frequency values for sensory evaluation traits.

| Genotype | Trait | 1  | 2  | 3  | 4  | 5  | 6  | 7  |
|----------|-------|----|----|----|----|----|----|----|
| AX882    | Bs    | 15 | 11 | 30 | 0  | 30 | 7  | 7  |
|          | Cs    | 4  | 30 | 33 | 0  | 11 | 19 | 4  |
|          | Ss    | 19 | 19 | 37 | 0  | 15 | 4  | 7  |
|          | As    | 30 | 19 | 19 | 0  | 11 | 19 | 4  |
|          | Sa    | 11 | 26 | 33 | 15 | 0  | 11 | 4  |
|          | Fs    | 15 | 41 | 19 | 15 | 7  | 4  | 0  |
| C6006    | Bs    | 19 | 26 | 0  | 15 | 0  | 26 | 15 |
|          | Cs    | 7  | 37 | 26 | 0  | 15 | 11 | 4  |
|          | Ss    | 33 | 30 | 15 | 11 | 4  | 4  | 4  |
|          | As    | 41 | 26 | 0  | 0  | 19 | 7  | 7  |
|          | Sa    | 7  | 44 | 22 | 0  | 11 | 11 | 4  |
|          | Fs    | 15 | 26 | 22 | 22 | 0  | 15 | 0  |
| CIM06    | Bs    | 22 | 22 | 26 | 11 | 11 | 4  | 4  |
|          | Cs    | 15 | 26 | 19 | 15 | 19 | 4  | 4  |
|          | Ss    | 26 | 33 | 22 | 0  | 4  | 11 | 4  |
|          | As    | 26 | 33 | 0  | 22 | 0  | 4  | 15 |
|          | Sa    | 11 | 7  | 15 | 0  | 26 | 30 | 11 |
|          | Fs    | 26 | 15 | 30 | 11 | 7  | 7  | 4  |

Relative frequencies in percentages for the 7-point measuring scale. Bs, Brightness; Cs, Chewiness; Ss, Springiness; As, Adhesiveness; Sa, Surface appearance and Fs, Firmness.
